# Supplementary material for: Next-generation sequencing of homologous recombination genes could predict efficacy of platinum-based chemotherapy in non-small cell lung cancer
Source: Front Oncol. 2022 Dec 14;12:1035808. doi: 10.3389/fonc.2022.1035808 (PMC9794762; doi:10.3389/fonc.2022.1035808)
Supplement: Supplementary file 2 [file DataSheet_1.xlsx]

## Sheet: Supplementary Table 1
Supplementary Table 1 HR gene list in this study
BLM
BRCA1
BRCA2
GEN1
MRE11A
PPP4R2
RAD50
RAD51
RAD51B
RAD51C
RAD51D
RAD52
RAD54L
RECQL
RECQL4
RPA1
SLX4
TOP3A
WRN
XRCC2
XRCC3

## Sheet: Supplementary Table 2
	Supplementary Table 2 Clinicopathological characteristics and response to platinum-based chemotherapy of BRCA1/2-mutated patients
Number	Patient ID	Gender	Age	Smoking	Pathology	Stage	Received platinum-based chemotherapy	ORR to platinum-based therapy	PFS (Months) of platinum-based therapy	OS(Months)	Driver mutations	Somatic/Germetic	BRCA1/2	p.HGVS	Frequency (%)	Possibility of damaging(polyphen2)	Other malignancies
1	P1	Female	45	Never	Adenocarcinoma	IIIB	Yes	PR	18.4+	35.1+	--	Germline mutation	BRCA2	p.3098Tyr-Terminal	--	0.99	No
2	P3	Female	68	Smoker	Adenocarcinoma	IV	Yes	PR	14	45.6+	--	Somatic	BRCA2	p.622_631del	7.14	0.99	No
3	P8	Male	68	Smoker	Adenocarcinoma	IV	Yes	PR	8	10	--	Somatic	BRCA1	p.D522H	5.38	0.99	No
4	P11	Male	49	Smoker	Adenocarcinoma	IV	Yes	PR	6.7	40.3+	--	Somatic	BRCA2	p.Q2501H	50.7	0.66	No
5	P47	Male	66	Smoker	Squamous carcinoma	IV	Yes	PD	1.6	2	--	Somatic	BRCA1	p.E597*	1.8	1	No
6	P43	Male	66	Smoker	Squamous carcinoma	IV	Yes	SD	37	45	--	Somatic	BRCA1	p.E1781*	39.8	1	No
7	P10	Male	62	Smoker	Adenocarcinoma	IV	Yes	PR	7	22.7	--	Somatic	BRCA2	p.W2725*	0.2	1	No
8	P12	Male	74	Smoker	Squamous carcinoma	IV	Yes	PR	5.6	8.3	--	Somatic	BRCA1	p.S1211F	21.4	0.998	No
9		Female	62	Never	Adenocarcinoma	IV	No（EGFR-TKI）	--	--	--	EGFR p.E746_A7 50del	Somatic	BRCA1	p.G972*	1.3	1	No
														p.E1134*	1.7	1
														p.G1138*	2	1
													BRCA2	p.Y792*	1.5	1
														p.Y3308*	2.7	1
10		Male	63	Smoker	Squamous carcinoma	IV	No（Anlotinib）	--	--	--	--	Somatic	BRCA1	p.S873*	3.15	1	No
													BRCA1	p.L1600F	3.49	0.63
11		Male	75	Smoker	Adenocarcinoma	IV	No（Chinese herb）	--	--	--	--	Somatic	BRCA2	p.C1809F	0.7	0.99	No
													BRCA2	p.P740Qfs* 32	0.2	0.99
12	P13	Male	76	Smoker	Squamous carcinoma	IV	Yes	PR	5.3+	--	--	Somatic	BRCA2	p.E1581K	3.7	benign	No
13	P20	Male	68	Never	Adenocarcinoma	IV	Yes	PR	15.3+	16.1+	--	Somatic	BRCA2	p.C1958S	12.3		No
14	P2	Female	58	Never	Adenocarcinoma	IV	Yes（after resistance to EGFR-TKI）	PR	19.6	55.1	EGFR p.E746-A750del	Somatic	BRCA2	p.E654K	0.73		No
15		Female	77	Never	Adenocarcinoma	IV	No（EGFR-TKI）	--	--	--	EGFR p.S768I EGFR p.V774M	Somatic	BRCA1	p.C994F	6.8		No
16		Female	65	Never	Adenocarcinoma	IV	No（EGFR-TKIs）	--	--	--	EGFR L858R	Somatic	BRCA2	p.E597K	52.8		No
17		Female	68	Never	Squamous carcinoma	IIIC	No（Radiotherapy followed by Albumin paclitaxel）	--	--	--	--	Somatic	BRCA2	p.E674Q	2.53		No
The "+" after the time of PFS and OS indicated that the end of the observation had not been reached.

## Sheet: Supplementary Table 3
Supplementary Table 3 Clinicopathological characteristics and response to platinum-based chemotherapy of germline HR gene-mutated patients
Number	Patient ID	Gender	Age	Smoking	Pathology of lung tumor	Stage	Received platinum-based chemotherapy	ORR to platinum-based therapy	PFS(Months) of platinum-based therapy	OS(Months)	Concurrent targetabel alterations	Mutated germline gene	Mutation type	Possibility of damaging（polyphen2）	Other malignancies	TMB	PD-L1 expression
1	P1	Female	45	Never	Adenocarcinoma	IIIB	Yes	PR	18.4+	35.1+	--	BRCA2	p.Tyr3098Terminal	0.99	No	41.19	<1%
2	P41	Male	77	Ever smoker	Squamous carcinoma	IV	Yes	SD	2.3	4.1	--	BLM	p.Leu107PhefsTer36	1	No	0	0.7
3	P16	Female	77	Never	Adenocarcinoma	IV	Yes（after resistance to EGFR-TKI）	PR	4.5	7.1	EGFR L858R	WRN	p.Gly1007AlafsTer16	1	No	5.16	0.65
												ATM	p.Ser821ValfsTer2	1
4	P26	Male	74	Never	Squamous carcinoma	IV	Yes	SD	7	9	--	MRE11A	N/A	0.99	No	9.95	0
5		Male	76	Smoker	Adenocarcinoma	IV	No (Chinese herb)	--	--		--	RAD51C	p.R212H	0.99	No	8.19	0.05
The "+" after the time of PFS and OS indicated that the end of the observation had not been reached.

## Sheet: Supplementary Table 4
Supplementary Table 4 Clinicopathological characteristics and response to platinum-based chemotherapy of somatic HR gene-mutated patients
Number	Patient ID	Gender	Age	Smoking	Pathology of lung tumor	Stage	Received platinum-based chemotherapy	ORR to platinum-based therapy	PFS(Months) of platinum-based therapy	OS(Months)	Concurrent targetabel alterations	Mutated somatic gene	Mutation type	Possibility of damaging（polyphen2）	Other malignancies	TMB	PD-L1 expression
1	P2	Female	58	Never	Adenocarcinoma	IV	Yes（after resistance to EGFR-TKI）	PR	19.6	55.1	EGFR p.745_750 del; EGFR p.T790M	BRCA2	p.E654K	0.02	No	10.54	0.05
												SLX4	p.P552S	1
												WRN	p.S63Y	1
												ATM	p.D983Y	1
												ATM	p.D1013N	0.002
2	P3	Female	68	Smoker	Adenocarcinoma	IV	Yes	PR	14	45.6+	--	BRCA2	p.622_631del		No	0.98	30-40%+
3	P5	Male	62	Smoker	Squamous carcinoma	IV	Yes	PR	9	36.2	--	MRE11	p.667_667 del		No	15.8	50-60%
												RAD50	p.K932fs
												SLX4	p.T1705N	0.986
4	P6	Male	52	Smoker	Adenocarcinoma	IV	Yes	PR	9	23.7	--	RAD50	p.H531N p.I761T	0.4% 96%	No	8.76	0
5	P7	Male	31	Smoker	Adenocarcinoma	IV	Yes	PR	9	9	--	RAD54L	p.Q261H	ERROR(100%)	No	7.18	80%-90%+
6	P8	Male	68	Smoker	Adenocarcinoma	IV	Yes	PR	8	10	--	BRCA1	p.D522H	1	No	31.76	NA
7	P10	Male	62	Smoker	Adenocarcinoma	IV	Yes	PR	7	22.7	--	BRCA2	p.W2725*		No	12.9	NA
8	P11	Male	49	Smoker	Adenocarcinoma	IV	Yes（after resistance to EGFR-TKI）	PR	6.7	40.3+	EGFR p.V769M	BRCA2	p.Q2501H	0.668	No	30.48	80-90%
9	P12	Male	74	Smoker	Squamous carcinoma	IV	Yes	PR	5.6	8.3	--	BRCA1	p.S1211F	0.998	No	24.88	0.9
10	P19	Male	77	Ever smoker	Squamous carcinoma	IV	Yes	PR	14.6	15.9	--	SLX4	p.P1562R	1	No	9.86	0.4
11	P21	Male	74	Smoker	Squamous carcinoma	IV	Yes	SD	11	13	--	BLM	p.H1091R	0.165	No	27.96	1-2%
12	P31	Male	56	Ever smoker	Adenocarcinoma	IV	Yes	SD	5.6	47.2	--	GEN1	p.G146W fs*10	1	No	12.32	25-30%
13	P37	Female	54	Never	Adenocarcinoma	IV	Yes	SD	5.6	17	--	BLM	p.561_562 del		No	11.01	NA
14												MRE11	p.667_667 del
15	P43	Male	66	Smoker	Squamous carcinoma	IV	Yes	SD	37	45	--	BRCA1	p.E1781*		No	NA	NA
16	P47	Male	66	Smoker	Squamous carcinoma	IV	Yes	PD	1.6	2	--	BRCA1	p.E597*		No	5.63	0.6
17	P53	Female	37	Smoker	Squamous carcinoma	IV	Yes	PD	1.5	3.1	--	RAD51C	NA		Yes(tongue squamous cell carcinoma)	9.68	0.2
18		Male	68	Never	Squamous carcinoma	IV	No	--	--	--	--	XRCC2	p.L151V	0.349	Yes(DLBCL,tongue squamous cell carcinoma)	5.69	0
19		Male	63	Never	Squamous carcinoma	III	No	--	--	--	--	BRCA1	p.S873*		No	15.33	--
												BRCA1	p.L1600F	0.63
20		Female	68	Never	Squamous carcinoma	IIIB	No	--	--	--	--	BRCA2	p.E674Q	0.243	No	4.27	3-5%
												RAD50	p.K845N	0.979
21		Female	74	Never	Adenocarcinoma	IV	No	--	--	--	EGFR p.S768I EGFR p.V774M	BRCA1	p.C994F	0.027	No	2.86	0
22		Male	55	Smoker	Adenocarcinoma	IV	No	--	--	--	EGFR ex19 del	BLM	p.L372F	1	No	13.41	80-90%+
												BLM	p.G512fs
23		Female	73	Never	Adenocarcinoma	IV	No	--	--	--	EGFR ex19 del	RAD51D	p.Q41H	0.956	No	11.49	5%+
												WRN	p.G1377C	0.64
24		Male	62	Smoker	Adenocarcinoma	IV	No	--	--	--	--	GEN1	p.M783I	0	No	50.72	80-90%+
												SLX4	p.S1129X/Y	0.982
25		Female	59	Never	Adenocarcinoma	III	No	--	--	--	EGFR L858R	RAD52	p.N76K	1	No	0.98	30-40%+
26		Male	50	Never	NSCLC(Nos)	IV	No	--	--	--	--	XRCC2	N/A		No	5.16	0
27		Male	76	Ever smoker	Adenocarcinoma	IV	No	--	--	--	--	RECQL	p.S608C	0.771	No	7.51	0.8
												RECQL4	p.E582Q	1
28		Male	70	Smoker	Squamous carcinoma	IV	No	--	--	--	--	RECQL4	p.A395T	0.228	No	6.57	0.02
29		Male	71	Ever smoker	Adenocarcinoma	IV	No	--	--	--	--	RAD51D	p.R5T	0.998	No	19.72	0.7
30		Male	74	Smoker	Squamous carcinoma	IV	No	--	--	--	--	RAD50	p.D1170N	1	No	10.08	0.1
31		Female	72	Never	Adenocarcinoma	IV	No	--	--	--	EGFR ex19 del	RECQL4	p.Trp613Ser	1	No	1.08	0
32		Male	67	Smoker	Adenocarcinoma	IV	No	--	--	--	--	RECQL4	p.E1029K	0.049	No	6.57	0
33		Male	52	Never	Adenocarcinoma	IV	No	--	--	--	EGFR ex19 del	RECQL4	p.R347H	0.805	No	1.95	0
The "+" after the time of PFS and OS indicated that the end of the observation had not been reached.

## Sheet: Supplementary Table 5
	Supplymentary Table 5 Univariate Cox hazard analysis of each HR gene associated with progression-free survival and overall survival
	HR genes mutation	Number of patients with mutation	PFS		OS
			HR (95% CI)	p value	HR (95% CI）	p value
	BLM	3	1.095 (0.339-3.538)	0.879	1.988 (0.604-6.537)	0.258
	BRCA1	4	0.591 (0.180-1.943)	0.387	1.585 (0.562-4.471)	0.384
	BRCA2	4	0.450 (0.139-1.452)	0.181	0.144 (0.020-1.052)	0.056
	GEN1	1	1.479 (0.201-10.901)	0.701	0.466 (0.063-3.468)	0.456
	MRE11A	3	0.945 (0.292-3.059)	0.924	1.042 (0.321-3.379)	0.945
	RAD50	2	0.660 (0.159-2.744)	0.567	0.684 (0.164-2.846)	0.601
	RAD51C	1	32.273 (2.855-364.791)	0.005 *	25.996 (2.357-286.705)	0.008 *
	RAD54L	1	0.669 (0.092-4.883)	0.692	2.775 (0.369-20.886)	0.322
	SLX4	3	0.419 (0.128-1.374)	0.151	0.594 (0.181-1.947)	0.39
	WRN	2	0.590 (0.136-2.553)	0.48	0.731 (0.171-3.132)	0.673
	XRCC2	1	0.000 (0.000-Inf)	0.997	0.541 (0.073-3.990)	0.547
	The asterisk indicated a statistically significant difference, that was, the p-value is less than 0.05.

## Sheet: Supplementary Table 6 
Supplymentary Table 6 The main treatment-related toxicities of 54 NSCLC patients included in the efficacy analysis
Sample ID	HR gene mutation	Adverse events	Toxicity Type
			Myelosuppression	Gastrointestinal reaction	Fatigue
P04	No	Yes			1
P09	No	Yes	2	2	2
P13	No	Yes	1
P14	No	No
P15	No	Yes	1	2	2
P17	No	Yes	4		2
P18	No	Yes			2
P20	No	Yes			2
P22	No	Yes		2	2
P23	No	Yes	3		2
P24	No	Yes	3	2
P25	No	Yes	3
P27	No	Yes		2
P28	No	Yes			1
P29	No	Yes	1		1
P30	No	Yes	2	2	3
P32	No	Yes	4	1	2
P33	No	Yes	3
P34	No	Yes		1	1
P35	No	Yes	1
P36	No	Yes	2		2
P38	No	Yes		2	1
P39	No	No
P40	No	Yes
P42	No	Yes	3
P44	No	Yes		1
P45	No	Yes		2	1
P46	No	Yes		1
P48	No	Yes	4	1	2
P49	No	Yes	2
P50	No	Yes	2	3
P51	No	Yes		1
P52	No	Yes	4		2
P54	No	Yes	1
P01	Yes	Yes	3	2	1
P02	Yes	Yes	3
P03	Yes	No
P05	Yes	Yes	1		1
P06	Yes	No
P07	Yes	No
P08	Yes	Yes	4		2
P10	Yes	Yes		1	2
P11	Yes	Yes			1
P12	Yes	Yes	3		2
P16	Yes	Yes	3
P19	Yes	Yes	2	1
P21	Yes	Yes	2		1
P26	Yes	Yes	1		1
P31	Yes	Yes	2
P37	Yes	Yes	3	2
P41	Yes	Yes	2
P43	Yes	Yes	4
P47	Yes	Yes		1
P53	Yes	Yes	2	2
Patients number		49	33	21	26
Frequency		0.907	0.611	0.389	0.481

## Sheet: Supplementary Table 7
Supplymentary Table 7 Comparison of the differences in the proportion of patient related to the treatment-related toxicities between the HR gene mutation and wild-type groups
Group	AE(-)	AE(+)	p value	AE (grade 1/2 )	AE (grade 3/4 )	p value
HR genes MU	3	17	0.35	10	7	0.75
HR genes WT	2	32		21	11
